# Supplementary material for: Effects of Black Raspberry on Dibenzo[ a,l ]Pyrene Diol Epoxide Induced DNA Adducts, Mutagenesis, and Tumorigenesis in the Mouse Oral Cavity
Source: Oxford University Press journal article supplement (doi:10.1158/1940-6207.capr-17-0278), 2017-11-20
Supplement: 19406207capr170278-sup-188512_2_supp_4377425_wz26h6.docx [file 19406207capr170278-sup-188512_2_supp_4377425_wz26h6.docx]

| **Table S1. Body Weight of mice treated with DB[*a,l*]PDE in the absence and presence of BRB** | | |
| --- | --- | --- |
|  | Body Weight (gram) ± Standard Error | |
| Week | DB[*a,l*]PDE | DB[*a,l*]PDE+BRB |
| 0 | 16.7 ± 0.2 | 16.7 ± 0.2 |
| 1 | 17.9 ± 0.2 | 17.7 ± 0.1 |
| 2 | 19.1 ± 0.2 | 18.5 ± 0.2 |
| 3 | 19.4 ± 0.2 | 19 ± 0.2 |
| 4 | 19.9 ± 0.2 | 19.2 ± 0.2 |
| 6 | 21.6 ± 0.3 | 21.3 ± 0.2 |
| 8 | 23 ± 0.4 | 22.7 ± 0.3 |
| 10 | 24.6 ± 0.4 | 24.1 ± 0.3 |
| 12 | 26.3 ± 0.5 | 25.7 ± 0.4 |
| 14 | 27.7 ± 0.5 | 26.6 ± 0.4 |
| 16 | 29 ± 0.5 | 27.9 ± 0.5 |
| 20 | 30.7 ± 0.6 | 29.1 ± 0.5 |
| 24 | 31.8 ± 0.6 | 30.6 ± 0.6 |
| 28 | 32.2 ± 0.6 | 31.6 ± 0.6 |
| 32 | 32.5 ± 0.7 | 32.8 ± 0.6 |
| 35 | 31.4 ± 0.8 | 32.3 ± 0.9 |
| 38 | 29.5 ± 0.9 | 30.7 ± 0.7 |
| 40 | 26.9 ± 0.9 | 27.9 ± 0.9 |
